# Supplementary material for: Beta3-Tubulin Is Critical for Microtubule Dynamics, Cell Cycle Regulation, and Spontaneous Release of Microvesicles in Human Malignant Melanoma Cells (A375)
Source: PubMed Central journal article supplement (PMC7084453; doi:10.3390/ijms21051656), 2020-02-28
Supplement: ijms-21-01656-s001.pdf [file ijms-21-01656-s001.pdf]

## Supplementary data

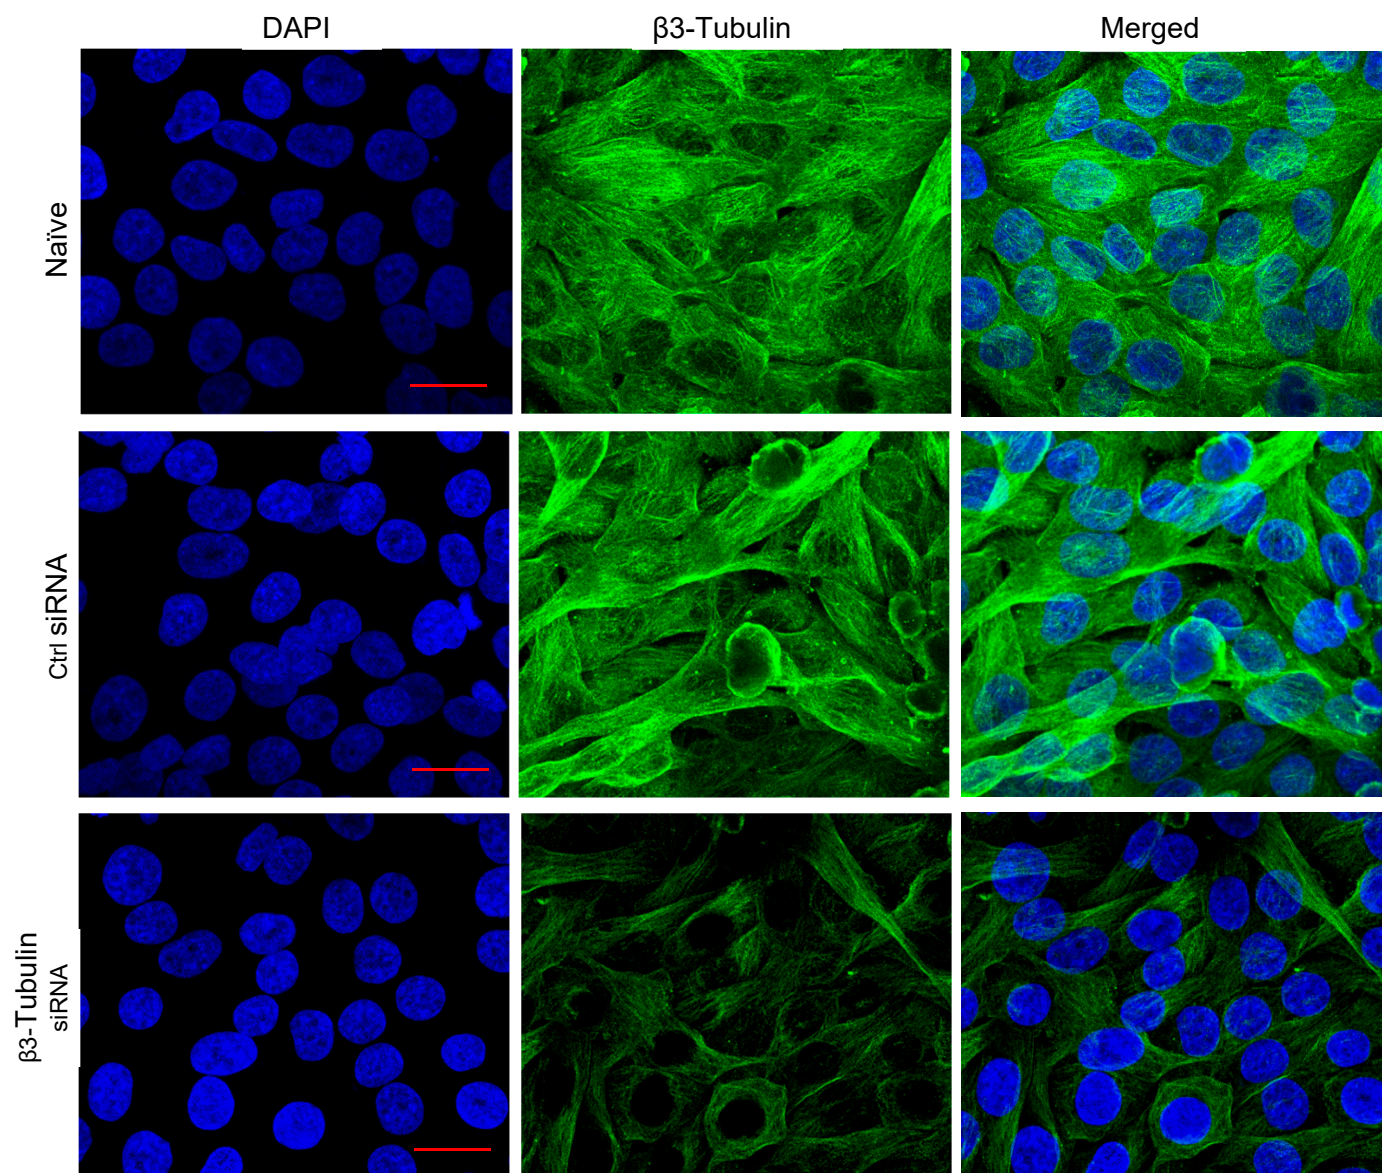

**Supplemental figure S1. siRNA knockdown of  $\beta$ 3-tubulin in A375 melanoma cells.** Naïve, control (ctrl)-, and  $\beta$ 3-tubulin siRNA-treated cells were immunostained with antibodies specific for  $\beta$ 3-tubulin (green), and DAPI (blue) was used as nuclear DNA counterstain. Original magnification  $\times 630$  (bar, 20  $\mu$ m).

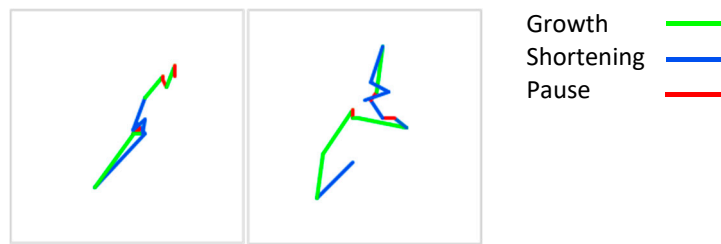

**Supplemental figure S2.** Two representative traces of the Microtubules (MT) +ends displacement obtained by computer-assisted hand clicking using ImageJ software (Manual tracking plugin, <https://imagej.nih.gov/ij/plugins/track/track.html>).

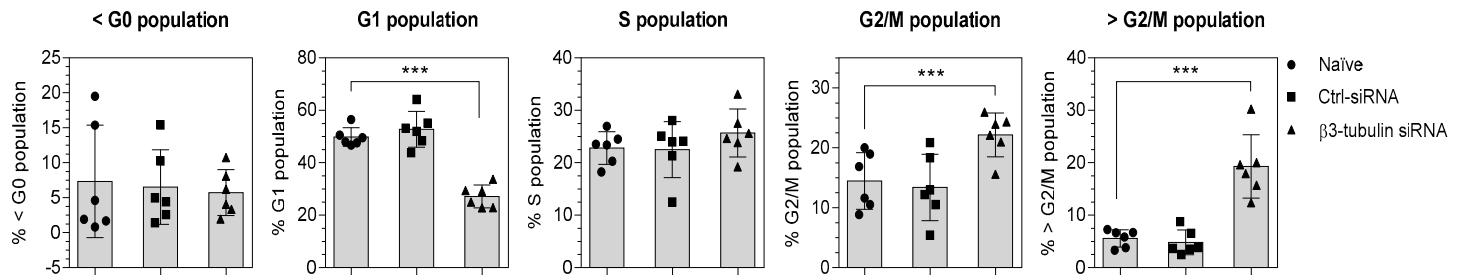

**Supplemental figure S3. Cell cycle analysis.**  $\beta$ 3-tubulin knockdown redistributed cell cycle growth phases and induced G2/M cell cycle arrest. A375 melanoma cells were stained with Propidium Iodide (PI) and Cell cycle analysis was performed using a flow cytometer (Guava® easyCyte; MilliporeSigma). Data analysis was carried out using FlowJo v10.6.1 software. Statistical significance was determined between different groups using ANOVA with Tukey's correction for multiple comparisons.  $N = 6$ , \*\*\*,  $P < 0.001$ . versus naïve cells.

**Supplemental table S1:** MT dynamic parameters in the human skin malignant melanoma cells (A375). Data demonstrate the difference in MT+ends growth, shortening, pause frequency and dynamicity among naïve, control,  $\beta$ 3-tubulin siRNA transfected cells. Asterisks indicate \*,  $P < 0.05$ , \*\*\*,  $P < 0.001$  Student t-test versus naïve values.

| Naïve                   |                                     |                                         |                                       |                                                                   |                                         |
|-------------------------|-------------------------------------|-----------------------------------------|---------------------------------------|-------------------------------------------------------------------|-----------------------------------------|
| Microtubules (MT)       | Growth ( $\mu\text{m}/\text{min}$ ) | Shortening ( $\mu\text{m}/\text{min}$ ) | Pause frequency ( $\text{min}^{-1}$ ) | Total MT+ends distance +, growth; -, shortening ( $\mu\text{m}$ ) | Dynamicity ( $\mu\text{m}/\text{min}$ ) |
| MT1                     | 35.67                               | 29.36                                   | 32                                    | -1.57                                                             | 65.03                                   |
| MT2                     | 57.82                               | 27.99                                   | 36                                    | -7.45                                                             | 85.82                                   |
| MT3                     | 18.55                               | 32.22                                   | 32                                    | 3.41                                                              | 50.78                                   |
| MT4                     | 22.54                               | 49.05                                   | 28                                    | 6.62                                                              | 71.59                                   |
| MT5                     | 17.97                               | 39.28                                   | 36                                    | 5.32                                                              | 57.25                                   |
| MT6                     | 34.78                               | 30.58                                   | 32                                    | -1.04                                                             | 65.36                                   |
| MT7                     | 38.66                               | 45.82                                   | 36                                    | 4.79                                                              | 84.48                                   |
| MT8                     | 31.15                               | 20.46                                   | 40                                    | -2.67                                                             | 51.62                                   |
| MT9                     | 21.22                               | 47.69                                   | 28                                    | 6.61                                                              | 68.91                                   |
| MT10                    | 44.41                               | 28.46                                   | 36                                    | -3.98                                                             | 72.87                                   |
| <b>Mean</b>             | <b>32.277</b>                       | <b>35.091</b>                           | <b>33.6</b>                           | <b>1.004</b>                                                      | <b>67.371</b>                           |
| Control siRNA           |                                     |                                         |                                       |                                                                   |                                         |
| Microtubules (MT)       | Growth ( $\mu\text{m}/\text{min}$ ) | Shortening ( $\mu\text{m}/\text{min}$ ) | Pause frequency ( $\text{min}^{-1}$ ) | Total MT+ends distance +, growth; -, shortening ( $\mu\text{m}$ ) | Dynamicity ( $\mu\text{m}/\text{min}$ ) |
| MT1                     | 35.38                               | 20.44                                   | 44                                    | 3.73                                                              | 55.82                                   |
| MT2                     | 41.78                               | 32.05                                   | 24                                    | 2.43                                                              | 73.84                                   |
| MT3                     | 28.53                               | 42.62                                   | 40                                    | -3.52                                                             | 71.16                                   |
| MT4                     | 23.50                               | 29.19                                   | 36                                    | -1.42                                                             | 52.71                                   |
| MT5                     | 25.56                               | 20.91                                   | 32                                    | 1.16                                                              | 46.47                                   |
| MT6                     | 51.36                               | 22.08                                   | 32                                    | 7.32                                                              | 73.45                                   |
| MT7                     | 38.46                               | 25.15                                   | 32                                    | 3.32                                                              | 63.62                                   |
| MT8                     | 40.39                               | 33.11                                   | 32                                    | 1.82                                                              | 73.51                                   |
| MT9                     | 41.64                               | 43.33                                   | 32                                    | -0.42                                                             | 84.98                                   |
| MT10                    | 38.35                               | 51.76                                   | 40                                    | -3.35                                                             | 90.12                                   |
| <b>Mean</b>             | <b>36.495</b>                       | <b>32.064</b>                           | <b>34.4</b>                           | <b>1.107</b>                                                      | <b>68.568</b>                           |
| $\beta$ 3-tubulin siRNA |                                     |                                         |                                       |                                                                   |                                         |
| Microtubules (MT)       | Growth ( $\mu\text{m}/\text{min}$ ) | Shortening ( $\mu\text{m}/\text{min}$ ) | Pause frequency ( $\text{min}^{-1}$ ) | Total MT+ends distance +, growth; -, shortening ( $\mu\text{m}$ ) | Dynamicity ( $\mu\text{m}/\text{min}$ ) |
| MT1                     | 12.38                               | 18.19                                   | 40                                    | -1.45                                                             | 30.58                                   |
| MT2                     | 18.27                               | 19.35                                   | 32                                    | -0.26                                                             | 37.62                                   |
| MT3                     | 16.06                               | 19.19                                   | 44                                    | -0.78                                                             | 35.25                                   |
| MT4                     | 17.26                               | 14.31                                   | 44                                    | 0.74                                                              | 31.56                                   |
| MT5                     | 17.77                               | 17.43                                   | 40                                    | 0.08                                                              | 35.21                                   |
| MT6                     | 19.44                               | 20.23                                   | 36                                    | -0.19                                                             | 39.67                                   |
| MT7                     | 18.04                               | 14.41                                   | 44                                    | 0.91                                                              | 32.46                                   |
| MT8                     | 21.31                               | 19.97                                   | 36                                    | 0.33                                                              | 41.28                                   |
| MT9                     | 23.27                               | 9.93                                    | 44                                    | 3.33                                                              | 33.21                                   |
| MT10                    | 30.74                               | 12.64                                   | 40                                    | 3.52                                                              | 43.38                                   |
| <b>Mean</b>             | <b>19.454***</b>                    | <b>16.565***</b>                        | <b>40*</b>                            | <b>0.623***</b>                                                   | <b>36.022***</b>                        |
